# Supplementary material for: CEBPA–double-mutated acute myeloid leukemia displays a unique phenotypic profile: a reliable screening method and insight into biological features
Source: PubMed Central journal article supplement — Haematologica. 2016 Nov 8;102(3):529–40. doi: 10.3324/haematol.2016.151910 (PMC5394975; doi:10.3324/haematol.2016.151910), 2017-03
Supplement: 2016_151910-Disclosures_and_Contributions.pdf [file 2016_151910-Disclosures_and_Contributions.pdf]

Haematologica  
HAEMATOL/2016/151910  
Version 3

CEBPA - double mutated acute myeloid leukemia displays a unique phenotypic profile: a reliable screening method and insight into biological features

Francesco Mannelli, Vanessa Ponziani, Sara Bencini, Maria Ida Bonetti, Matteo Benelli, Ilaria Cutini, Giacomo Gianfaldoni, Barbara Scappini, Fabiana Pancani, Matteo Piccini, Tommaso Rondelli, Roberto Caporale, Anna Maria Grazia Gelli, Benedetta Peruzzi, Marco Chiarini, Erika Borlenghi, Orietta Spinelli, Damiano Giupponi, Pamela Zanghi', Renato Bassan, Alessandro Rambaldi, Giuseppe Rossi, and Alberto Bosi

Disclosures: Funding of the study: Istituto Toscano Tumori, Ente Cassa di Risparmio di Firenze (2009-15520) and Regione Toscana (Bando Salute 2009 – research nr 46)

Contributions: FM conceived and designed the study, performed flow cytometry analysis, interpreted data and wrote the manuscript. VP and FP performed molecular analysis. SB and MIB performed flow cytometry analysis. MB performed statistical analyses. TR carried out cell sorting. IC, MP and BS collected clinical data. GG collected clinical data and critically reviewed the manuscript. RC, AG and BP contributed to flow cytometry analysis and cell sorting. MC, EB, OS, DG, PZ, AR, RB and GR provided flow cytometry, clinical and molecular data of validation set. AB contributed to the analysis and interpretation of data and critically reviewed the manuscript. All authors approved the final version of the manuscript.
